# Supplementary material for: Photo-triggered AuAg@g-C3N4 composite nanoplatform for multimodal broad-spectrum antibacterial therapy
Source: Royal Society of Chemistry journal article supplement (doi:10.1039/d4an00950a), 2024-01-01
Supplement: d4an00950a1.pdf [file d4an00950a1.pdf]

## Supporting Information

### Photo-triggered AuAg@g-C<sub>3</sub>N<sub>4</sub> composites nanoplatform for multimodal broad-spectrum antibacterial therapy

Jing Xinyi,<sup>a</sup> Shan Huang,<sup>a</sup> Hui Wang,<sup>a</sup> Yue Ding,<sup>d</sup> Huiqin Yao<sup>\*c</sup>, Xiaojun Chen<sup>\*a</sup> and Jun-Jie Zhu<sup>\*b</sup>

a. College of Chemistry and Molecular Engineering, Nanjing Tech University, Nanjing 211816, PR China.

b. State Key Laboratory of Analytical Chemistry for life Science, School of Chemistry and Chemical Engineering, Nanjing University, Nanjing 210023, China.

c. Department of Chemistry, School of Basic Medical Sciences, Ningxia Medical University, Yinchuan, 750004, China.

d. College of Biotechnology and Pharmaceutical Engineering, Nanjing Tech University, Nanjing 211816, PR China

E-mail: yaohq@nxmu.edu.cn; chenxj@njtech.edu.cn; jjzhu@nju.edu.cn

## Content

|                |   |
|----------------|---|
| Figure S1..... | 2 |
| Figure S2..... | 3 |
| Figure S3..... | 4 |

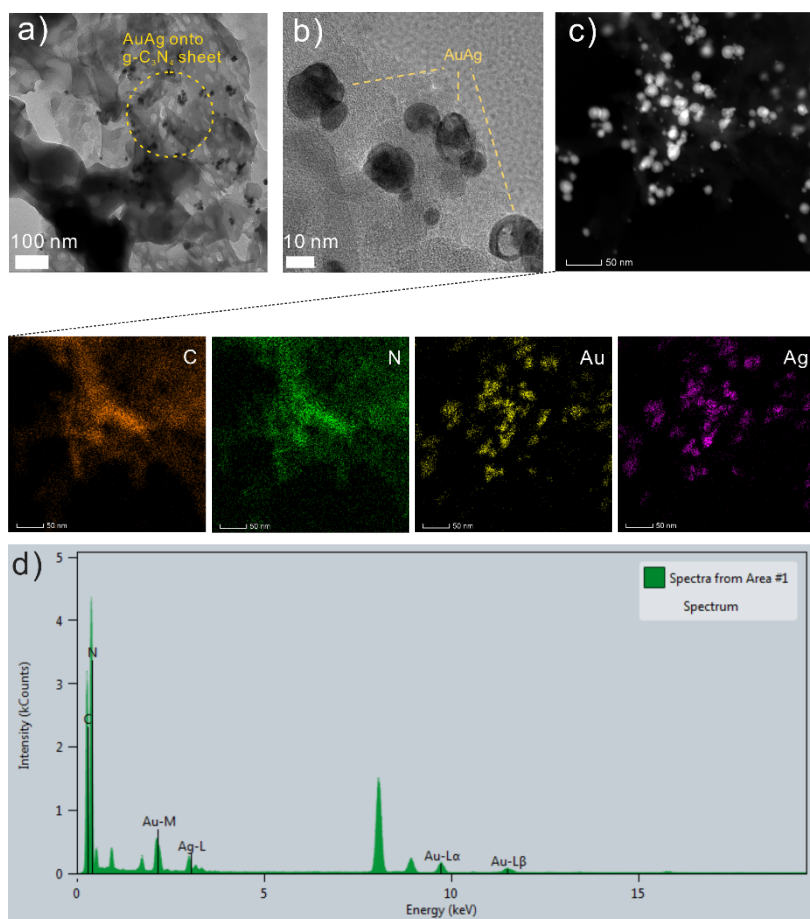

**Figure S1.** a) TEM images of the 1 mM of AuAg@g-C<sub>3</sub>N<sub>4</sub> showing the uniform existence of AuAg on the g-C<sub>3</sub>N<sub>4</sub> sheet. b) HR-TEM image of the boundary between the smaller and the spherical shaped AuAg on g-C<sub>3</sub>N<sub>4</sub>. c) Selected area of drift correlated spectrum for elemental mapping. Elemental maps of C (orange color), N (green color), Au (yellow color), and Ag (purple color). (d) Elemental composition of the AuAg@g-C<sub>3</sub>N<sub>4</sub>.

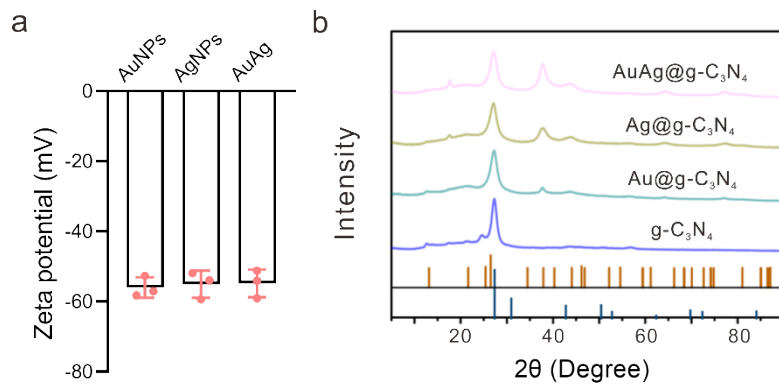

**Figure S2.** a) Zeta potential of AuNPs, AgNPs, and AuAg. b) Representative XRD patterns of g-C<sub>3</sub>N<sub>4</sub>, Au@g-C<sub>3</sub>N<sub>4</sub>, Ag@g-C<sub>3</sub>N<sub>4</sub>, and AuAg@g-C<sub>3</sub>N<sub>4</sub>.

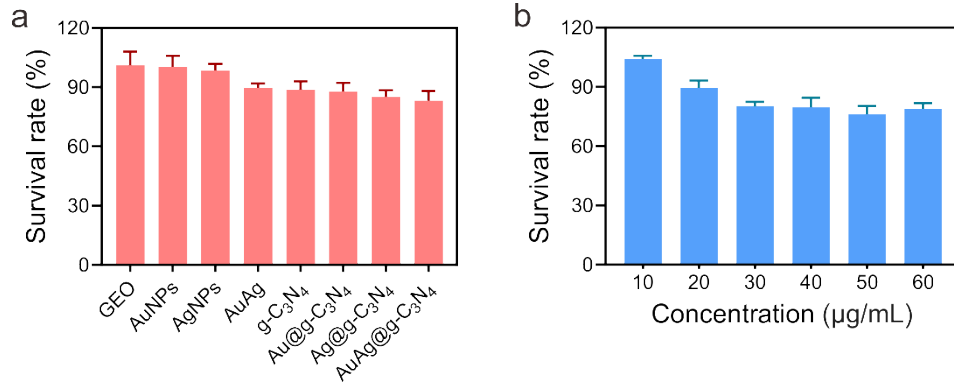

**Figure S3.** Cytocompatibility experiments for composite materials. a) Cytotoxicity of GEO, AuNPs, AgNPs, AuAg, g-C<sub>3</sub>N<sub>4</sub>, Au@g-C<sub>3</sub>N<sub>4</sub>, Ag@g-C<sub>3</sub>N<sub>4</sub>, AuAg@g-C<sub>3</sub>N<sub>4</sub> at 20 mg/L. b) Cell viability of AuAg@g-C<sub>3</sub>N<sub>4</sub> detected at 10 mg/L-60 mg/L.
